# Supplementary material
Source: PubMed Central journal article supplement (PMC3993991)
Supplement: NIHMS496748-supplement-Supplemental_Equation_Derivations.pdf [file NIHMS496748-supplement-Supplemental_Equation_Derivations.pdf]

### Flow in bulk solution:

The Navier Stokes equations of incompressible flows in 3D, non-porous systems contains 3 momentum equations and 1 incompressibility constraint. Here,  $\rho$  is the fluid density ( $\text{kg}\cdot\text{m}^{-3}$ );  $u$  is the flow velocity ( $\text{L}\cdot\text{min}^{-1}$ );  $P$  is the pressure (Pa);  $f$  is the given force ( $\text{kg}\cdot\text{m}\cdot\text{t}^{-2}$ );  $\sigma$  is the stress  $\text{kg}\cdot\text{m}^{-1}\cdot\text{t}^{-2}$ .

$$\rho \left( \frac{\partial u}{\partial t} + u \cdot \nabla u - f \right) - \nabla \cdot \sigma = 0$$
$$\nabla \cdot u = 0$$

In order to define initial conditions, stress must be defined in terms of pressure and fluid viscosity.

$$\sigma = -pI + 2\eta\varepsilon$$

Here,  $\eta$  is the dynamic viscosity ( $\text{kg}\cdot\text{m}^{-1}\text{s}^{-1}$ ).  $I$  is the identity matrix. The strain-rate tensor,  $\varepsilon$ , can be expanded into:

$$\varepsilon = \frac{1}{2}(\nabla u + (\nabla u)^T)$$

Substituting and simplifying:

$$\nabla \cdot \sigma = \nabla \cdot (-pI + \eta(\nabla u + (\nabla u)^T))$$

$$\nabla \cdot \sigma = \nabla \cdot (-pI + \eta(\nabla \cdot (\nabla u) + \nabla \cdot (\nabla u)^T))$$

$$\nabla \cdot \sigma = \nabla \cdot (-pI + \eta(\nabla \cdot (\nabla u) + \nabla(\nabla \cdot u)))$$

Since  $\nabla \cdot u = 0$  due to the incompressibility constraint:

$$\nabla \cdot \sigma = -\nabla p + \eta \nabla^2 u$$

Therefore, assuming that  $f$  is 0 for laminar flow:

$$\rho \left( \frac{\partial u}{\partial t} + u \cdot \nabla u \right) + \nabla p - \eta \nabla^2 u = 0$$

Since the time-independent Navier Stokes is solved in order to reduce the complexity of the system,  $\frac{\partial u}{\partial t}$  drops out:

$$\rho(u \cdot \nabla u) + \nabla p - \eta \nabla^2 u = 0$$

### Flow in porous beads:

For flow in porous medium, we use Brinkman's equation,<sup>24</sup> a modification of Navier Stokes to take into account permeability and porosity of the porous medium. We assume  $f$  is zero. Here,  $k$  is the permeability ( $\text{m}^2$ ); and  $\varepsilon_p$  is the porosity (dimensionless).

$$\rho \left( \frac{\partial u}{\partial t} + u \cdot \nabla u - f \right) - \nabla \cdot \sigma = 0$$

$$\frac{\rho}{\varepsilon_p} \left( \frac{\partial u}{\partial t} + u \cdot \nabla u \right) - \nabla \cdot \sigma = 0$$

$$\frac{\rho}{\varepsilon_p} \left( \frac{\partial u}{\partial t} \right) + \frac{\eta}{k} u - f - \nabla \cdot \sigma = 0$$

In a similar fashion, we expand stress out into its pressure and viscosity terms.

$$\nabla \cdot \sigma = \nabla \cdot \left( -pI + \frac{\eta}{\varepsilon_p} (\nabla u + (\nabla u)^T) \right)$$

After substituting and simplifying, we end up with:

$$\frac{\rho}{\varepsilon_p} \left( \frac{\partial u}{\partial t} \right) + \frac{\eta}{k} u + \nabla p - \frac{\eta}{\varepsilon_p} \nabla^2 u = 0$$
